# Supplementary material for: A Standardised Core Outcome Set for Measurement and Reporting Sedentary Behaviour Interventional Research: The CROSBI Consensus Study
Source: MDPI journal article supplement (doi:10.3390/ijerph19159666), 2022-08-05
Supplement: s1 [file s1]

**Supplementary Figure S1.** Flow Diagram of Systematic Review.

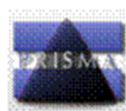

# PRISMA 2009 Flow Diagram

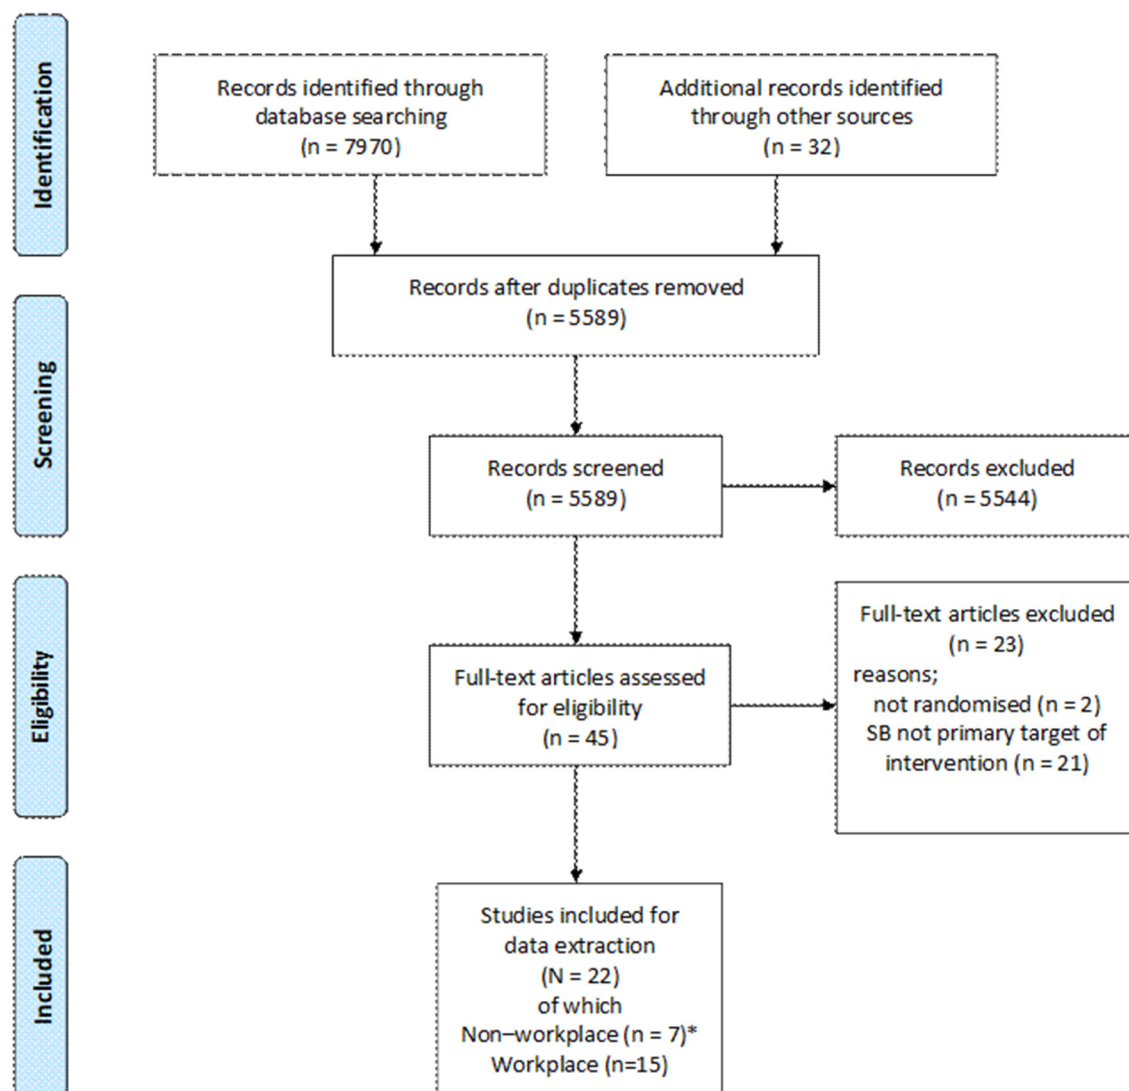

\*Curran F, Blake C, Cunningham C, Perrotta C, van der Ploeg H, Matthews J, et al. (2021) Efficacy, characteristics, behavioural models and behaviour change strategies, of non-workplace interventions specifically targeting sedentary behaviour: a systematic review and meta-analysis of randomised control trials in healthy ambulatory adults. PLoS ONE 16(9): e0256828. <https://doi.org/10.1371/journal.pone.0256828>

From Moher D, Liberati A, Tetzlaff J, Altman DG; PRISMA Group. Preferred reporting items for systematic reviews and meta-analyses: the PRISMA statement. PLoS Med. 2009 Jul 21;6(7):e1000097. doi: 10.1371/journal.pmed.1000097. Epub 2009 Jul 21. PMID: 19621072; PMCID: PMC2707599.

**Supplementary Table S1.** Data Domains and Data Items Identified for Initial Expert Panel Review.

| Domain                          | Item                                |
|---------------------------------|-------------------------------------|
| Demographic (9)                 | Age                                 |
|                                 | Gender                              |
|                                 | Employment Status                   |
|                                 | Occupation                          |
|                                 | Education level                     |
|                                 | Ethnicity                           |
|                                 | Health status                       |
|                                 | measure at                          |
|                                 | At baseline                         |
| Device Type (5)                 | At follow-up                        |
|                                 | Inclinometer                        |
|                                 | Accelerometer                       |
|                                 | Combined Inclinometer/Accelerometer |
|                                 | Pedometer                           |
| Device Validity (3)             | Other                               |
|                                 | Minimum wear time hours/ day        |
|                                 | Minimum wear time days /week        |
|                                 | Device position                     |
| Device wear-time (3)            | Total daily wear-time               |
|                                 | Waking non/sleep wear-time          |
|                                 | Sleep wear-time                     |
| Sedentary pattern outcomes (10) | Sitting time                        |
|                                 | Standing time                       |
|                                 | Stepping time                       |
|                                 | Sedentary breaks                    |
|                                 | Short sedentary bouts               |
|                                 | Prolonged sedentary bouts           |

|                                                             |                                    |
|-------------------------------------------------------------|------------------------------------|
|                                                             | Standing bouts                     |
|                                                             | Stepping bouts                     |
| measure                                                     | At baseline                        |
|                                                             | At follow-up                       |
| Reporting Measures of Sitting, Standing, Stepping time (13) | mins/day                           |
|                                                             | hours/day                          |
|                                                             | mins/workday                       |
|                                                             | hours/workday                      |
|                                                             | mins/non-work day                  |
|                                                             | hours/non-workday                  |
|                                                             | mins/work hours on workday         |
|                                                             | mins/non-work hours on workday     |
|                                                             | % daily waking hours               |
|                                                             | % of work hours                    |
|                                                             | % of total daily hours             |
|                                                             | % time of non-work hours           |
|                                                             | mins/8 hour leisure                |
| Reporting Measures of Sedentary breaks (5)                  | n/day                              |
|                                                             | n/work day                         |
|                                                             | n/non-work day                     |
|                                                             | n/hours of workplace sitting       |
|                                                             | n/non work time on workday         |
| Reporting Measures of Sedentary bouts (14)                  | prolonged sitting bout measured as |
|                                                             | A. >30min                          |
|                                                             | B. >35min                          |
|                                                             | C. >60min                          |
|                                                             | short sitting bout measured as     |
|                                                             | A. <10min                          |

|                                                                 |                                                                                  |
|-----------------------------------------------------------------|----------------------------------------------------------------------------------|
|                                                                 | B. <20min                                                                        |
|                                                                 | C. <30min                                                                        |
|                                                                 | D. <35min                                                                        |
|                                                                 | longest sitting bout mins                                                        |
|                                                                 | average duration sitting bout mins                                               |
|                                                                 | total duration sitting bouts mins/day                                            |
|                                                                 | n/day                                                                            |
|                                                                 | n/work day                                                                       |
|                                                                 | n/non-work day                                                                   |
|                                                                 | n/hours of workplace sitting                                                     |
|                                                                 | n/non-work time on workday                                                       |
|                                                                 | mins/day                                                                         |
|                                                                 | hours/day                                                                        |
|                                                                 | mins/workday                                                                     |
|                                                                 | n/hour workday                                                                   |
| Standing bouts (1)                                              | n/day                                                                            |
| Stepping bouts (1)                                              | n/day                                                                            |
| Statistic to report for all core Sedentary Pattern outcomes (2) | Mean and Standard deviation Pre and Post -intervention (baseline and follow- up) |
|                                                                 | Change in mean and CI for each outcome                                           |
| Measures of physical activity (5)                               | Light intensity physical activity                                                |
|                                                                 | Moderate intensity physical activity                                             |
|                                                                 | Vigorous intensity physical activity                                             |
|                                                                 | Moderate-Vigorous intensity physical activity                                    |
|                                                                 | Physical Activity Energy Expenditure (kj/kg/day)                                 |
| Reporting of time in each Physical activity (6)                 | mins/day                                                                         |
|                                                                 | min/8hour leisure                                                                |
|                                                                 | mins/workday                                                                     |
|                                                                 | % of daily waking hours                                                          |

|                                                                   |                                                                                     |
|-------------------------------------------------------------------|-------------------------------------------------------------------------------------|
|                                                                   | % wear-time on work days                                                            |
|                                                                   | % wear-time during work hours                                                       |
| Reporting Physical Activity Energy Expenditure (kj/kg/day)<br>(4) | Waking hours, all days                                                              |
|                                                                   | Waking hours, working day                                                           |
|                                                                   | Waking hours, non-working days                                                      |
|                                                                   | Working hours, working days                                                         |
| Statistic to report for all core physical activity outcomes (2)   | Mean and Standard deviation Pre and Post -intervention<br>(baseline and follow- up) |
|                                                                   | Change in mean and CI for each outcome                                              |
| Anthropometric Measures (6)                                       | Weight (kg)                                                                         |
|                                                                   | Height (cm)                                                                         |
|                                                                   | BMI (body mass index)                                                               |
|                                                                   | Waist (cm <sup>2</sup> )                                                            |
|                                                                   | Body Fat (%)                                                                        |
|                                                                   | Fat free mass (%)                                                                   |
| Statistic to report for all core Anthropometric outcomes<br>(2)   | Mean and Standard deviation Pre and Post -intervention<br>(baseline and follow- up) |
|                                                                   | Change in mean and CI for each outcome                                              |
| Biomarkers (17)                                                   | Fasting Plasma Glucose (mmol/L)                                                     |
|                                                                   | Fasting Serum insulin (pmol/L)                                                      |
|                                                                   | HbA1c (%)                                                                           |
|                                                                   | HOMA-IR                                                                             |
|                                                                   | HOMA-%B                                                                             |
|                                                                   | Total Cholesterol (mmol/L)                                                          |
|                                                                   | HDL Cholesterol (mmol/L)                                                            |
|                                                                   | LDL Cholesterol (mmol/L)                                                            |
|                                                                   | Non LDL Cholestrol (mmol/L)                                                         |
|                                                                   | LDL/HDL Cholestrol                                                                  |

|                                                         |                                                                                  |
|---------------------------------------------------------|----------------------------------------------------------------------------------|
|                                                         | Triglycerides (mmol/L)                                                           |
|                                                         | Aortic Augmentation Index (%)                                                    |
|                                                         | Subendocardial Variability (%)                                                   |
|                                                         | Systolic BP (mmHg)                                                               |
|                                                         | Diastolic BP (mmHg)                                                              |
|                                                         | Estimated VO2 (mL/kg/min)                                                        |
|                                                         | Resting Heart Rate                                                               |
| Statistic to report for all core biometric outcomes (2) | Mean and Standard deviation Pre and Post -intervention (baseline and follow- up) |
|                                                         | Change in mean and CI for each outcome                                           |
| Domains = 19                                            | Domain Items = 110                                                               |

Mins, minutes; n/, number per; CI, confidence interval; kj/kg/day, kilojoules per kilogram per day; kg, kilogram; cm, centimetre; mmol/l, millimole per litre; pmol/l, picomoles per litre; HbA1c,; HOMA-IR, Homeostatic Model Assessment for Insulin Resistance; HOMA-%B, homeostatic model assessment to quantify beta-cell function; HDL, high density lipoprotein; LDL, low density lipoprotein; BP (mmHg), Blood Pressure in millimetres of mercury; VO2 (mL/kg/min), Volume of oxygen in millilitre per kilogram per minute.

**Supplementary Table S2.** Additional Items identified by Expert Review.

| Additional items for inclusion from expert panel review |                                      |
|---------------------------------------------------------|--------------------------------------|
| Domain                                                  | Item                                 |
| Demographics                                            | Population type (Healthy /clinical ) |
| Device Type                                             | smart watch                          |
| Device Type                                             | Make                                 |
| Device Type                                             | Model                                |
| Device Type                                             | Manufacturer                         |
| Sedentary pattern outcomes                              | Sedentary time                       |
| Sedentary pattern outcomes                              | Sleeping Time /LPA/ MVPA separately  |
| Sedentary breaks                                        | number of steps /day                 |

LPA, light physical activity; MVPA, moderate to vigorous physical activity;

**Supplementary Table S3.** Data Items for round 1 Delphi.

| Outcome code | Item                  | HelpText                                                                                                                                                               |
|--------------|-----------------------|------------------------------------------------------------------------------------------------------------------------------------------------------------------------|
| 01.01        | Age                   | How old participants are/the age (in years) of participants                                                                                                            |
| 01.02        | Gender                | How participants identify themselves with regard to being male, female, or non-binary/third gender                                                                     |
| 01.03        | Employment Status     | Whether participants are in paid employment, voluntary employment, unemployed, retired, student in education, other                                                    |
| 01.04        | Occupation            | Whether participants employment is active, semi-active, sedentary                                                                                                      |
| 01.05        | Education level       | Highest education level achieved by participant (Primary /Secondary/ Tertiary)                                                                                         |
| 01.06        | Ethnicity             | The social group with common national and cultural tradition that participants identify as belonging to, e.g., white/Caucasian, Asian, black/African/Caribbean/other   |
| 01.07        | Population type       | Whether participants are healthy sedentary, healthy active or a clinical cohort                                                                                        |
| 01.08        | Weight                | The amount that a participant weighs (measured in Kilos or pounds)                                                                                                     |
| 01.09        | Height                | Height of a participant while standing on a hard surface (measured in centimetres or inches)                                                                           |
| 01.10        | BMI (body mass index) | An approximate measure of whether a participant is overweight or underweight, calculated by dividing their weight in kilograms by the square of their height in metres |
| 01.11        | Measured at baseline  | Population measures at baseline (pre-intervention)                                                                                                                     |

|              |                                                                                                                           |                                                                                                                                                      |
|--------------|---------------------------------------------------------------------------------------------------------------------------|------------------------------------------------------------------------------------------------------------------------------------------------------|
| <b>01.12</b> | Measured at follow-up                                                                                                     | Population measures at Follow-up (Post intervention))                                                                                                |
| <b>01.13</b> | Report as; Mean, standard deviation, and range, or number or % in each category, across all for participants at baseline  | numerical population measures reported as mean, SD and range e.g. weight; categorical measures reported as number or % in each e.g., Ethnicity       |
| <b>01.14</b> | Report as; Mean, standard deviation, and range, or number or % in each category, across all for participants at follow-up | numerical population measures reported as mean, SD and range e.g., weight; categorical measures reported as number or % in each e.g., Ethnicity      |
| <b>02.01</b> | Inclinometer                                                                                                              | a device which captures differences in body position (e.g., sitting vs. lying vs. standing)                                                          |
| <b>02.02</b> | Accelerometer                                                                                                             | an activity tracking device which captures acceleration of movement and categorises it into different intensities e.g., ActiGraph GT3X accelerometer |
| <b>02.03</b> | Combined Inclinometer/Accelerometer                                                                                       | a device which captures information about acceleration and also body position (i.e., sitting/lying, standing and stepping) e.g., activPAL            |
| <b>02.04</b> | Pedometer                                                                                                                 | a device which records the number of steps taken (e.g., jawbone ; fitbit;)                                                                           |
| <b>02.05</b> | Smartwatch                                                                                                                | a wrist-worn device with activity or fitness tracking capability, connected to mobile technology                                                     |
| <b>02.06</b> | Other                                                                                                                     | please specify if other type of device                                                                                                               |
| <b>03.01</b> | Device type                                                                                                               | the name of make, model and manufacturer of the device used to record outcomes                                                                       |
| <b>03.02</b> | Device sensor position                                                                                                    | the position where the device sensors are worn or attached to the participants body                                                                  |
| <b>03.03</b> | Device minimum wear time hours / day                                                                                      | the minimum number of hours per day that participants must wear the device to be included in the analysis                                            |
| <b>03.04</b> | Device minimum wear time days /week                                                                                       | the minimum number of days that participants must wear the device to be included in the analysis                                                     |

|              |                                                                       |                                                                                                                                                                           |
|--------------|-----------------------------------------------------------------------|---------------------------------------------------------------------------------------------------------------------------------------------------------------------------|
| <b>04.01</b> | Device; total daily wear-time                                         | the total amount of time, in hours or minutes, that the device is worn over 24 hours                                                                                      |
| <b>04.02</b> | Device; waking / non-sleep wear-time                                  | the amount of time, in hours or minutes per day, that the device is worn while the participant is awake / not sleeping                                                    |
| <b>04.03</b> | Device; Sleep wear-time                                               | the amount of time, in hours or minutes per day, that the device is worn while the participant is sleeping                                                                |
| <b>04.04</b> | Report as; mean, standard deviation and range,                        | mean, standard deviation and range, across all participants for measures of device wear time                                                                              |
| <b>05.01</b> | Sedentary time                                                        | time, in hours or minutes, that participant spent in sitting, reclining or lying, while awake.                                                                            |
| <b>05.02</b> | Sitting time                                                          | time, in hours or minutes, that participant spent in sitting                                                                                                              |
| <b>05.03</b> | Standing time                                                         | time, in hours or minutes, that participant spent in standing                                                                                                             |
| <b>05.04</b> | Stepping time                                                         | time, in hours or minutes, that participant spent in stepping                                                                                                             |
| <b>05.05</b> | Measure at baseline                                                   | Posture measures at baseline (pre-intervention)                                                                                                                           |
| <b>05.06</b> | Measure at follow-up                                                  | Posture measures at follow-up (post-intervention)                                                                                                                         |
| <b>06.01</b> | Daily time, in the specified posture                                  | time, in hours or minutes per day, that participant spent in the specified posture i.e. in sedentary time; sitting time; standing time; stepping time                     |
| <b>06.02</b> | Work day, daily time in the specified posture                         | time, in hours or minutes <b>per workday</b> , that participant spent in sitting, reclining or lying while awake                                                          |
| <b>06.03</b> | Non-Work day, in the specified posture                                | time, in hours or minutes <b>per non-workday</b> , that participant spent in the specified posture i.e. in sedentary time; sitting time; standing time; stepping time     |
| <b>06.04</b> | hourly time during work hours, on a workday, in the specified posture | time in minutes <b>per hour at work on a workday</b> , that participant spent in the specified posture i.e. in sedentary time; sitting time; standing time; stepping time |

|              |                                                                                                                       |                                                                                                                                                                                     |
|--------------|-----------------------------------------------------------------------------------------------------------------------|-------------------------------------------------------------------------------------------------------------------------------------------------------------------------------------|
| <b>06.05</b> | hourly time during NON-work hours on a workday, in the specified posture                                              | time in minutes <b>per hour while not at work on a workday</b> , that participant spent in the specified posture i.e. in sedentary time; sitting time; standing time; stepping time |
| <b>06.06</b> | % daily waking hours                                                                                                  | % of daily waking hours that participant spent in the specified posture i.e. in sedentary time; sitting time; standing time; stepping time                                          |
| <b>06.07</b> | % of work hours                                                                                                       | % of work hours that participant spent in the specified posture i.e., in sedentary time; sitting time; standing time; stepping time                                                 |
| <b>06.08</b> | % of total daily hours                                                                                                | % of total daily hours that participant spent in the specified posture i.e. in sedentary time; sitting time; standing time; stepping time                                           |
| <b>06.09</b> | % time of non-work hours                                                                                              | % time of non-work hours that participant spent in the specified posture i.e. in sedentary time; sitting time; standing time; stepping time                                         |
| <b>06.10</b> | Report as; Mean, standard deviation, and range for participants, Pre and Post -intervention (baseline and follow- up) | report the mean, standard deviation, and range, across all participants, Pre and Post -intervention (baseline and follow-up)                                                        |
| <b>06.11</b> | Report as; change in mean, and confidence interval for each outcome                                                   | report the change in mean, and the confidence interval for postural time measures across all participants                                                                           |
| <b>07.01</b> | Sedentary breaks; Sit to stand or upright transitions                                                                 | A non-sedentary bout between two sedentary bouts (measured as a change in posture from sitting, reclining or lying to standing posture)                                             |
| <b>07.02</b> | Sedentary breaks; Movement breaks                                                                                     | A non-sedentary, non-stationary bout between two sedentary bouts i.e. includes moving e.g. walking                                                                                  |
| <b>07.03</b> | Sedentary breaks; Number of steps                                                                                     | The number of steps the participant takes                                                                                                                                           |
| <b>07.04</b> | Measure at baseline                                                                                                   | Sedentary breaks, measured at baseline (pre-intervention)                                                                                                                           |
| <b>07.05</b> | Measure at follow-up                                                                                                  | Sedentary breaks measured at follow-up (post-intervention)                                                                                                                          |

|              |                                                                                                                       |                                                                                                                                                                                                                    |
|--------------|-----------------------------------------------------------------------------------------------------------------------|--------------------------------------------------------------------------------------------------------------------------------------------------------------------------------------------------------------------|
| <b>08.01</b> | n/day ; number of sedentary breaks daily                                                                              | number of sedentary breaks by the participant per day; for use with core outcome, sit-stand transitions / upright movements, and / or, core outcome, movement breaks                                               |
| <b>08.02</b> | n/work day; number of sedentary breaks per work day                                                                   | number of sedentary breaks by the participant per WORK day; for use with core outcome, sit-stand transitions / upright movements, and /or, core outcome, movement breaks                                           |
| <b>08.03</b> | n/non-work day; number of sedentary breaks per non work day                                                           | number of sedentary breaks by the participant per NON-work day / leisure day; for use with core outcome, sit-stand transitions / upright movements, and / or, core outcome, movement breaks                        |
| <b>08.04</b> | n/hours of workplace sitting; of sedentary breaks                                                                     | number of sedentary breaks by participant per hours of sitting at work; for use with core outcome, sit-stand transitions / upright movements, and / or, core outcome, movement breaks                              |
| <b>08.05</b> | n/non work time on workday; of sedentary breaks                                                                       | number of sedentary breaks by the participant while not at work / during leisure time on a work day; for use with core outcome, sit-stand transitions / upright movements, and / or, core outcome, movement breaks |
| <b>08.06</b> | Report as; mean, standard deviation, and range for participants, Pre and Post -intervention (baseline and follow- up) | report mean, standard deviation, and range pre and post -intervention (baseline and follow- up), for measures of sedentary breaks, across all participants                                                         |
| <b>08.07</b> | Report as; change in mean, and confidence interval, or change in rate, for each outcome                               | report the change in mean, and the confidence interval for measures of sedentary breaks across all participants                                                                                                    |
| <b>09.01</b> | Short sedentary bouts <10 minutes                                                                                     | A short period of uninterrupted sitting, reclining or lying time of less than 10 minutes                                                                                                                           |
| <b>09.02</b> | Prolonged sedentary bouts >30 minutes                                                                                 | A prolonged period of uninterrupted sitting, reclining or lying time of more than 30 minutes                                                                                                                       |
| <b>09.03</b> | Prolonged sedentary bouts >60 minutes                                                                                 | A prolonged period of uninterrupted sitting, reclining or lying time of more than 60 minutes                                                                                                                       |
| <b>09.04</b> | Standing bouts                                                                                                        | A period of uninterrupted standing time                                                                                                                                                                            |

|              |                                                                                                                       |                                                                                                                                                            |
|--------------|-----------------------------------------------------------------------------------------------------------------------|------------------------------------------------------------------------------------------------------------------------------------------------------------|
| <b>09.05</b> | Stepping bouts                                                                                                        | A period of uninterrupted stepping time                                                                                                                    |
| <b>09.06</b> | Measure at baseline                                                                                                   | Sedentary bouts measured at baseline (pre-intervention)                                                                                                    |
| <b>09.07</b> | Measure at follow-up                                                                                                  | Sedentary bouts measured at follow-up (post-intervention)                                                                                                  |
| <b>10.01</b> | average duration of bout, mins                                                                                        | average duration of participants bout in mins                                                                                                              |
| <b>10.02</b> | total duration of bouts, mins or hours /day                                                                           | total duration in minutes or hours per day, of time accumulated in specified bouts                                                                         |
| <b>10.03</b> | n/day                                                                                                                 | number of specified bouts per day                                                                                                                          |
| <b>10.04</b> | n/work day                                                                                                            | number of specified bouts per work day                                                                                                                     |
| <b>10.05</b> | n/non-work day                                                                                                        | number of specified bouts per NON work day                                                                                                                 |
| <b>10.06</b> | n/hours of workplace sitting                                                                                          | number of specified bouts per hours sitting at work                                                                                                        |
| <b>10.07</b> | n/non-work time on workday                                                                                            | number of specified bouts per non-work time on workday                                                                                                     |
| <b>10.08</b> | total duration of bouts, mins or hours / workday                                                                      | time in minutes or hours per WORK day, accumulated in specified bouts                                                                                      |
| <b>10.09</b> | Report as; mean, standard deviation, and range for participants, Pre and Post -intervention (baseline and follow- up) | report mean, standard deviation, and range pre and post - intervention (baseline and follow- up), for measures of sedentary bouts, across all participants |
| <b>10.10</b> | Report as; change in mean, and confidence interval, or change in rate for each outcome                                | report the change in mean, and the confidence interval for measures of sedentary bouts across all participants                                             |
| <b>11.01</b> | Light intensity physical activity, time                                                                               | activity performed at under 3 METs, including casual walking, doing household chores or activities of daily living                                         |
| <b>11.02</b> | Moderate intensity physical activity, time                                                                            | activity performed at between 3 and 6 METs, e.g., brisk walking, cycling, dancing. Double's tennis.                                                        |

|              |                                                                                                                       |                                                                                                                                                                                |
|--------------|-----------------------------------------------------------------------------------------------------------------------|--------------------------------------------------------------------------------------------------------------------------------------------------------------------------------|
| <b>11.03</b> | Vigorous intensity physical activity, time                                                                            | activity performed $\geq 6$ METs, e.g., hiking uphill, running, swimming laps, aerobic dancing, tennis.                                                                        |
| <b>11.04</b> | Moderate-vigorous intensity physical activity, time                                                                   | activity performed at $\geq 3$ and including some $\geq 6$ METs                                                                                                                |
| <b>11.05</b> | Physical Activity Energy Expenditure (kj/kg/day)                                                                      | The amount of energy used by participant per kilo of body weight per day                                                                                                       |
| <b>11.06</b> | Measure at baseline                                                                                                   | Physical activity measures at baseline (pre-intervention)                                                                                                                      |
| <b>11.07</b> | Measure at follow-up                                                                                                  | Physical activity measures at follow-up (post-intervention)                                                                                                                    |
| <b>12.01</b> | mins/day                                                                                                              | Time in minutes per day, spent by participant in the specified PA (light; moderate; vigorous; moderate-vigorous)                                                               |
| <b>12.02</b> | mins/workday                                                                                                          | Time, in minutes per work day, spent by participant in the specified PA (light; moderate; vigorous; moderate-vigorous)                                                         |
| <b>12.03</b> | % of daily waking hours                                                                                               | Time as a % of daily waking hours, spent by participant in the specified PA (light; moderate; vigorous; moderate-vigorous)                                                     |
| <b>12.04</b> | % wear time on work days                                                                                              | Time as % of wear time on work days, spent by participant in the specified PA (light; moderate; vigorous; moderate-vigorous)                                                   |
| <b>12.05</b> | % wear time during work hours                                                                                         | Time as % of wear time during work hours, spent by participant in the specified PA (light; moderate; vigorous; moderate-vigorous)                                              |
| <b>12.06</b> | Report as; mean, standard deviation, and range for participants, Pre and Post -intervention (baseline and follow- up) | report mean, standard deviation, and range pre and post -intervention (baseline and follow- up), for measures of physical activity energy expenditure, across all participants |
| <b>12.07</b> | Report as; change in mean, and confidence interval, for each outcome                                                  | report the change in mean, and the confidence interval for measures of physical activity across all participants                                                               |
| <b>13.01</b> | Waking hours, all days                                                                                                | Energy expenditure while awake for all days (work days and non-work days)                                                                                                      |

|              |                                                                                                                       |                                                                                                                                                              |
|--------------|-----------------------------------------------------------------------------------------------------------------------|--------------------------------------------------------------------------------------------------------------------------------------------------------------|
| <b>13.02</b> | Waking hours, working day                                                                                             | Energy expenditure while awake on work days                                                                                                                  |
| <b>13.03</b> | Waking hours, non-working days                                                                                        | Energy expenditure while awake for on non-work days                                                                                                          |
| <b>13.04</b> | Working hours, working days                                                                                           | Energy expenditure while at during working hours on workdays                                                                                                 |
| <b>13.05</b> | Report as; mean, standard deviation, and range for participants, Pre and Post -intervention (baseline and follow- up) | report mean, standard deviation, and range pre and post - intervention (baseline and follow- up), for measures of physical activity, across all participants |
| <b>13.06</b> | Report as; change in mean, and confidence interval, for each outcome                                                  | report the change in mean, and the confidence interval for measures of physical activity energy expenditure, across all participants                         |

SD, standard deviation; n/, number per; mins, minutes; METs metabolic equivalents; kj/kg/day, kilojoule per kilogram per day; PA, physical activity;

**Supplementary Table S4.** Round 1 Delphi Suggested Additional Items.

| Round 1 suggested additional items                                                                              |
|-----------------------------------------------------------------------------------------------------------------|
| Urban versus rural dwelling                                                                                     |
| Ability level (people living with a disability; chronic condition; special needs)                               |
| Sedentary time pattern outcomes; half bout duration; fragmentation of sedentary bouts; variation of bout length |
| baseline compositional values                                                                                   |
| bout median                                                                                                     |
| half-life bout duration                                                                                         |
| Medications use that is likely to interact with the intervention e.g. metformin                                 |
| Social economic status                                                                                          |
| Presence of chronic disease                                                                                     |

|                                                                                               |
|-----------------------------------------------------------------------------------------------|
| Domain or behaviour specific behaviours (via observation or self-report)                      |
| Statistical outcomes should be reported using median and IQR if distributions are not normal. |
| All data should be reported per 24 hours if at all possible.                                  |
| Self-reported sitting time (to see if perceptions differ from device measures)                |
| Urban versus rural dwelling                                                                   |

IQR, Inter Quartile Range.

**Supplementary Table S5.** Delphi Round 1 Ratings.

| Item              | Round 1 rating |     |               |        | n  | Include in round 2 and reason |                    |
|-------------------|----------------|-----|---------------|--------|----|-------------------------------|--------------------|
|                   | 1-3<br>(≤15%)  | 4-6 | 7-9<br>(≥50%) | median |    |                               |                    |
| Age               | 2%             | 2%  | 96%           | 9      | 50 | no                            | to reduce burden   |
| Gender            | 2%             | 8%  | 90%           | 9      | 49 | no                            | to reduce burden   |
| Employment Status | 2%             | 44% | 54%           | 7      | 50 | yes                           | meets in criteria  |
| Occupation        | 2%             | 48% | 50%           | 6.5    | 50 | yes                           | meets in criteria  |
| Education level   | 4%             | 50% | 46%           | 6      | 50 | no                            | meets out criteria |
| Ethnicity         | 10%            | 44% | 46%           | 6      | 50 | no                            | meets out criteria |
| Population type   | 2%             | 30% | 68%           | 7      | 47 | yes                           | meets in criteria  |

|                                                                                                                           |     |     |     |   |    |     |                        |
|---------------------------------------------------------------------------------------------------------------------------|-----|-----|-----|---|----|-----|------------------------|
| Weight                                                                                                                    | 12% | 30% | 58% | 7 | 50 | yes | meets in criteria      |
| Height                                                                                                                    | 14% | 34% | 52% | 7 | 50 | yes | meets in criteria      |
| BMI (body mass index)                                                                                                     | 4%  | 33% | 63% | 7 | 49 | yes | meets in criteria      |
| Measured at baseline                                                                                                      | 0%  | 6%  | 94% | 9 | 50 | no  | to reduce burden       |
| Measured at follow-up                                                                                                     | 6%  | 14% | 80% | 9 | 50 | no  | to reduce burden       |
| Report as; Mean, standard deviation, and range, or number or % in each category, across all for participants at baseline  | 0%  | 6%  | 94% | 9 | 48 | no  | to reduce burden       |
| Report as; Mean, standard deviation, and range, or number or % in each category, across all for participants at follow-up | 0%  | 15% | 85% | 9 | 47 | no  | to reduce burden       |
| Standardised clinical / health related measures                                                                           |     |     |     |   |    |     | Additional outcome     |
| Inclinometer                                                                                                              | 5%  | 12% | 84% | 8 | 43 |     | meets in criteria      |
| Accelerometer                                                                                                             | 7%  | 26% | 67% | 7 | 46 |     | meets in criteria      |
| Combined Inclinometer/Accelerometer                                                                                       | 7%  | 16% | 78% | 9 | 45 |     | meets in criteria      |
| Pedometer                                                                                                                 | 67% | 27% | 6%  | 3 | 48 | no  | exclusion criteria met |
| Smartwatch                                                                                                                | 33% | 48% | 19% | 5 | 48 | no  | exclusion criteria met |
| Other                                                                                                                     | 44% | 24% | 32% | 5 | 25 | no  | exclusion criteria met |



|                                                                                                                      |     |     |     |     |    |     |                        |
|----------------------------------------------------------------------------------------------------------------------|-----|-----|-----|-----|----|-----|------------------------|
| Daily time, in the specified posture                                                                                 | 2%  | 8%  | 90% | 9   | 50 | yes | meets in criteria      |
| Work day, daily time in the specified posture                                                                        | 10% | 42% | 48% | 6   | 50 | yes | out criteria not met   |
| Non-Work day, in the specified posture                                                                               | 10% | 44% | 46% | 6   | 50 | yes | out criteria not met   |
| hourly time during work hours, on a workday, in the specified posture                                                | 12% | 46% | 42% | 6   | 50 | yes | out criteria not met   |
| hourly time during NON-work hours on a workday, in the specified posture                                             | 12% | 50% | 38% | 6   | 50 | no  | exclusion criteria met |
| % daily waking hours                                                                                                 | 6%  | 22% | 72% | 8   | 50 | yes | meets in criteria      |
| % of work hours                                                                                                      | 14% | 30% | 56% | 7   | 50 | yes | meets in criteria      |
| % of total daily hours                                                                                               | 14% | 12% | 74% | 8   | 50 | yes | meets in criteria      |
| % time of non-work hours                                                                                             | 16% | 32% | 52% | 7   | 50 | yes | meets in criteria      |
| Report as; mean, standard deviation, and range for participants, Pre and Post -intervention (baseline and follow-up) | 0%  | 6%  | 94% | 9   | 49 | no  | to reduce burden       |
| Report as; change in mean, and confidence interval for each outcome                                                  | 2%  | 19% | 79% | 8.5 | 48 | no  | to reduce burden       |
| Sedentary breaks; Sit to stand or upright transitions                                                                | 4%  | 26% | 70% | 7.5 | 50 | yes | meets in criteria      |
| Sedentary breaks; Movement breaks                                                                                    | 10% | 18% | 72% | 7   | 50 | yes | meets in criteria      |
| Sedentary breaks; Number of steps                                                                                    | 10% | 43% | 47% | 6   | 49 | yes | meets in criteria      |

|                                                                                                                      |     |     |     |     |    |     |                      |
|----------------------------------------------------------------------------------------------------------------------|-----|-----|-----|-----|----|-----|----------------------|
| Measure at baseline                                                                                                  | 4%  | 10% | 86% | 9   | 50 | no  | to reduce burden     |
| Measure at follow-up                                                                                                 | 4%  | 10% | 86% | 9   | 50 | no  | to reduce burden     |
| n/day ; number of sedentary breaks daily                                                                             | 4%  | 26% | 70% | 7   | 50 | yes | meets in criteria    |
| n/work day; number of sedentary breaks per work day                                                                  | 14% | 46% | 40% | 6   | 50 | yes | out criteria not met |
| n/non-work day; number of sedentary breaks per non work day                                                          | 14% | 46% | 40% | 6   | 50 | yes | out criteria not met |
| n/hours of workplace sitting; of sedentary breaks                                                                    | 13% | 35% | 52% | 7   | 48 | yes | meets in criteria    |
| n/non work time on workday; of sedentary breaks                                                                      | 12% | 43% | 45% | 6   | 49 | yes | out criteria not met |
| Report as; mean, standard deviation, and range for participants, Pre and Post -intervention (baseline and follow-up) | 2%  | 15% | 83% | 8   | 48 | no  | to reduce burden     |
| Report as; change in mean, and confidence interval, or change in rate, for each outcome                              | 4%  | 25% | 71% | 8   | 48 | no  | to reduce burden     |
| Short sedentary bouts <10 minutes                                                                                    | 16% | 42% | 42% | 6   | 50 | no  | meets in criteria    |
| Prolonged sedentary bouts >30 minutes                                                                                | 2%  | 22% | 76% | 8   | 50 | yes | meets in criteria    |
| Prolonged sedentary bouts >60 minutes                                                                                | 8%  | 18% | 74% | 8   | 50 | yes | meets in criteria    |
| Standing bouts                                                                                                       | 12% | 42% | 46% | 6   | 50 | yes | out criteria not met |
| Stepping bouts                                                                                                       | 12% | 38% | 50% | 6.5 | 50 | yes | meets in criteria    |
| Measure at baseline                                                                                                  | 0%  | 14% | 86% | 9   | 50 | no  | to reduce burden     |

|                                                                                                                      |     |     |     |   |    |     |                        |
|----------------------------------------------------------------------------------------------------------------------|-----|-----|-----|---|----|-----|------------------------|
| Measure at follow-up                                                                                                 | 0%  | 14% | 86% | 9 | 50 | no  | to reduce burden       |
| average duration of bout, mins                                                                                       | 6%  | 30% | 64% | 7 | 50 | yes | meets in criteria      |
| total duration of bouts, mins or hours /day                                                                          | 8%  | 28% | 64% | 7 | 50 | yes | meets in criteria      |
| n/day                                                                                                                | 12% | 36% | 52% | 7 | 50 | yes | meets in criteria      |
| n/work day                                                                                                           | 20% | 46% | 34% | 6 | 50 | no  | exclusion criteria met |
| n/non-work day                                                                                                       | 24% | 42% | 34% | 6 | 50 | no  | exclusion criteria met |
| n/hours of workplace sitting                                                                                         | 14% | 39% | 47% | 6 | 49 | yes | out criteria not met   |
| n/non-work time on workday                                                                                           | 20% | 36% | 44% | 6 | 50 | no  | exclusion criteria met |
| total duration of bouts, mins or hours / workday                                                                     | 16% | 40% | 44% | 6 | 50 | no  | exclusion criteria met |
| Report as; mean, standard deviation, and range for participants, Pre and Post -intervention (baseline and follow-up) | 2%  | 15% | 83% | 8 | 48 | no  | to reduce burden       |
| Report as; change in mean, and confidence interval, or change in rate for each outcome                               | 4%  | 21% | 75% | 7 | 48 | no  | to reduce burden       |
| Weighted median bout duration or bout "half-life"                                                                    |     |     |     |   |    |     | Additional outcome     |
| Light intensity physical activity, time                                                                              | 0%  | 20% | 80% | 9 | 50 | yes | meets in criteria      |

|                                                                                                                      |     |     |     |     |    |     |                        |
|----------------------------------------------------------------------------------------------------------------------|-----|-----|-----|-----|----|-----|------------------------|
| Moderate intensity physical activity, time                                                                           | 0%  | 22% | 78% | 9   | 50 | yes | meets in criteria      |
| Vigorous intensity physical activity, time                                                                           | 0%  | 24% | 76% | 8.5 | 50 | yes | meets in criteria      |
| Moderate-Vigorous intensity physical activity, time                                                                  | 0%  | 24% | 76% | 8.5 | 50 | yes | meets in criteria      |
| Physical Activity Energy Expenditure (kj/kg/day)                                                                     | 22% | 49% | 29% | 5   | 49 | no  | exclusion criteria met |
| Measure at baseline                                                                                                  | 0%  | 16% | 84% | 9   | 50 | no  | to reduce burden       |
| Measure at follow-up                                                                                                 | 0%  | 14% | 86% | 9   | 50 | no  | to reduce burden       |
| mins/day                                                                                                             | 4%  | 4%  | 92% | 9   | 49 | yes | meets in criteria      |
| mins/workday                                                                                                         | 13% | 42% | 46% | 6   | 48 | no  | exclusion criteria met |
| % of daily waking hours                                                                                              | 15% | 19% | 67% | 7.5 | 48 | no  | out criteria not met   |
| % wear-time on work days                                                                                             | 21% | 35% | 44% | 6   | 48 | no  | exclusion criteria met |
| % wear-time during work hours                                                                                        | 21% | 36% | 43% | 6   | 47 | no  | exclusion criteria met |
| Report as; mean, standard deviation, and range for participants, Pre and Post -intervention (baseline and follow-up) | 2%  | 10% | 88% | 9   | 49 | no  | to reduce burden       |
| Report as; change in mean, and confidence interval, for each outcome                                                 | 6%  | 18% | 76% | 8   | 49 | no  | to reduce burden       |

|                                                                                                                      |     |     |     |     |    |    |                        |
|----------------------------------------------------------------------------------------------------------------------|-----|-----|-----|-----|----|----|------------------------|
| Waking hrs, all days                                                                                                 | 16% | 34% | 50% | 6.5 | 50 | no | Parent domain excluded |
| Waking hours, working day                                                                                            | 16% | 60% | 24% | 5   | 50 | no | Parent domain excluded |
| Waking hrs, non-working days                                                                                         | 16% | 60% | 24% | 5   | 50 | no | Parent domain excluded |
| Working hrs, working days                                                                                            | 18% | 62% | 20% | 5   | 50 | no | Parent domain excluded |
| Report as; mean, standard deviation, and range for participants, Pre and Post -intervention (baseline and follow-up) | 12% | 31% | 57% | 8   | 49 | no | Parent domain excluded |
| Report as; change in mean, and confidence interval, for each outcome                                                 | 18% | 31% | 51% | 7   | 49 | no | Parent domain excluded |

**Supplementary Table S6.** Delphi Round 2 Ratings.

| Item   | Round 2 rating      |     |                     |        |    |     | Include in COS and reason |
|--------|---------------------|-----|---------------------|--------|----|-----|---------------------------|
|        | 1-3 ( $\leq 15\%$ ) | 4-6 | 7-9 ( $\geq 70\%$ ) | median | n  |     |                           |
| Age    | 0%                  | 0%  | 100%                | 9      | 41 | yes | meets in criteria R1 & R2 |
| Gender | 0%                  | 7%  | 93%                 | 9      | 41 | yes | meets in criteria R1 & R2 |

|                                                                                                                           |     |     |     |   |    |     |                                |
|---------------------------------------------------------------------------------------------------------------------------|-----|-----|-----|---|----|-----|--------------------------------|
| Employment Status                                                                                                         | 2%  | 37% | 61% | 7 | 41 | no  | R2 Include criteria not met    |
| Occupation                                                                                                                | 0%  | 46% | 54% | 7 | 41 | no  | R2 Include criteria not met    |
| Education level                                                                                                           | 5%  | 51% | 44% | 6 | 41 | no  | R2 Include criteria not met    |
| Ethnicity                                                                                                                 | 10% | 46% | 44% | 6 | 41 | no  | R2 Include criteria not met    |
| Population type                                                                                                           | 3%  | 26% | 72% | 7 | 39 | yes | R2 meets include criteria      |
| Weight                                                                                                                    | 12% | 27% | 61% | 7 | 41 | no  | R2 Include criteria not met    |
| Height                                                                                                                    | 17% | 24% | 59% | 7 | 41 | no  | R2 Include criteria not met    |
| BMI (body mass index)                                                                                                     | 3%  | 25% | 73% | 9 | 40 | yes | meets in criteria R1 & R2      |
| Measured at baseline                                                                                                      |     |     |     |   |    | yes | meets in criteria R1 (Obvious) |
| Measured at follow-up                                                                                                     |     |     |     |   |    | yes | meets in criteria R1 (Obvious) |
| Report as; mean, standard deviation, and range, or number or % in each category, across all for participants at baseline  |     |     |     |   |    | yes | meets in criteria R1 (Obvious) |
| Report as; Mean, standard deviation, and range, or number or % in each category, across all for participants at follow-up |     |     |     |   |    | yes | meets in criteria R1 (Obvious) |
| Standardised clinical / health related measures                                                                           | 12% | 39% | 48% | 6 | 33 | no  | R2 Include criteria not met    |
| Inclinometer                                                                                                              | 3%  | 13% | 85% | 9 | 39 | yes | meets in criteria R1 & R2      |

|                                                |    |     |     |   |    |     |                                |
|------------------------------------------------|----|-----|-----|---|----|-----|--------------------------------|
| Accelerometer                                  | 5% | 28% | 68% | 7 | 40 | no  | R2 Include criteria not met    |
| Combined Inclinometer/Accelerometer            | 3% | 13% | 84% | 9 | 38 | yes | meets in criteria R1 & R2      |
| Pedometer                                      |    |     |     |   |    | no  | R1 exclusion criteria met      |
| Smartwatch                                     |    |     |     |   |    | no  | R1 exclusion criteria met      |
| Other                                          |    |     |     |   |    | no  | R1 exclusion criteria met      |
| Device type (Make / Model /Manufacturer)       |    |     |     |   |    | yes | meets in criteria R1 (Obvious) |
| Device sensor position                         |    |     |     |   |    | yes | meets in criteria R1 (Obvious) |
| Device minimum wear time hours / day           |    |     |     |   |    | yes | meets in criteria R1 (Obvious) |
| Device minimum wear time days /week            |    |     |     |   |    | yes | meets in criteria R1 (Obvious) |
| Device; total daily wear-time                  | 5% | 0%  | 95% | 9 | 41 | yes | meets in criteria R1 & R2      |
| Device; waking / non-sleep wear-time           | 2% | 2%  | 95% | 9 | 41 | yes | meets in criteria R1 & R2      |
| Device; Sleep wear-time                        | 2% | 7%  | 90% | 9 | 41 | yes | meets in criteria R1 & R2      |
| Report as; mean, standard deviation and range, |    |     |     |   |    | yes | meets in criteria R1 (Obvious) |
| Sedentary time                                 | 2% | 2%  | 95% | 9 | 41 | yes | meets in criteria R1 & R2      |
| Sitting time                                   | 2% | 7%  | 90% | 9 | 41 | yes | meets in criteria R1 & R2      |

|                                                                                                      |     |     |     |   |    |     |                                |
|------------------------------------------------------------------------------------------------------|-----|-----|-----|---|----|-----|--------------------------------|
| Standing time                                                                                        | 2%  | 7%  | 90% | 9 | 41 | yes | meets in criteria R1 & R2      |
| Stepping time                                                                                        | 7%  | 10% | 83% | 9 | 41 | yes | meets in criteria R1 & R2      |
| Measure at baseline                                                                                  |     |     |     |   |    | yes | meets in criteria R1 (Obvious) |
| Measure at follow-up                                                                                 |     |     |     |   |    | yes | meets in criteria R1 (Obvious) |
| Standardised self-report or observational measures including domain or behaviour specific behaviours | 6%  | 31% | 63% | 7 | 35 | no  | R2 Include criteria not met    |
| Daily time, in the specified posture                                                                 | 2%  | 5%  | 93% | 9 | 41 | yes | meets in criteria R1 & R2      |
| Work day, daily time in the specified posture                                                        | 10% | 63% | 27% | 6 | 41 | no  | R2 Include criteria not met    |
| Non-Work day, in the specified posture                                                               | 10% | 63% | 27% | 6 | 41 | no  | R2 Include criteria not met    |
| hourly time during work hours, on a workday, in the specified posture                                | 17% | 61% | 22% | 6 | 41 | no  | R2 Include criteria not met    |
| hourly time during NON-work hours on a workday, in the specified posture                             | 17% | 61% | 22% | 6 | 41 | no  | R2 Include criteria not met    |
| % daily waking hours                                                                                 | 5%  | 17% | 78% | 9 | 41 | yes | meets in criteria R1 & R2      |
| % of work hours                                                                                      | 5%  | 46% | 49% | 6 | 41 | no  | R2 Include criteria not met    |
| % of total daily hours                                                                               | 10% | 10% | 80% | 8 | 41 | yes | meets in criteria R1 & R2      |
| % time of non-work hours                                                                             | 10% | 39% | 51% | 7 | 41 | no  | R2 Include criteria not met    |

|                                                                                                                        |     |     |     |   |    |     |                                |
|------------------------------------------------------------------------------------------------------------------------|-----|-----|-----|---|----|-----|--------------------------------|
| Report as; Mean, standard deviation, and range for participants, Pre and Post - intervention (baseline and follow- up) |     |     |     |   |    | yes | meets in criteria R1 & R2      |
| Report as; change in mean, and confidence interval for each outcome                                                    |     |     |     |   |    | yes | meets in criteria R1 & R2      |
| Sedentary breaks; Sit to stand or upright transitions                                                                  | 5%  | 17% | 78% | 9 | 41 | yes | meets in criteria R1 & R2      |
| Sedentary breaks; Movement breaks                                                                                      | 10% | 12% | 78% | 8 | 41 | yes | meets in criteria R1 & R2      |
| Sedentary breaks; Number of steps                                                                                      | 8%  | 53% | 40% | 6 | 40 | no  | R2 Include criteria not met    |
| Measure at baseline                                                                                                    |     |     |     |   |    | yes | meets in criteria R1 (Obvious) |
| Measure at follow-up                                                                                                   |     |     |     |   |    | yes | meets in criteria R1 (Obvious) |
| n/day ; number of sedentary breaks daily                                                                               | 10% | 12% | 78% | 9 | 41 | yes | meets in criteria R1 & R2      |
| n/work day; number of sedentary breaks per work day                                                                    | 7%  | 63% | 29% | 6 | 41 | no  | R2 Include criteria not met    |
| n/non-work day; number of sedentary breaks per non work day                                                            | 7%  | 61% | 32% | 6 | 41 | no  | R2 Include criteria not met    |
| n/hours of workplace sitting; of sedentary breaks                                                                      | 12% | 44% | 44% | 6 | 41 | no  | R2 Include criteria not met    |
| n/non work time on workday; of sedentary breaks                                                                        | 12% | 51% | 37% | 6 | 41 | no  | R2 Include criteria not met    |
| Report as; mean, standard deviation, and range for participants, Pre and Post - intervention (baseline and follow- up) |     |     |     |   |    | yes | meets in criteria R1 (Obvious) |
| Report as; change in mean, and confidence interval, or change in rate, for each outcome                                |     |     |     |   |    | yes | meets in criteria R1 (Obvious) |

|                                                  |     |     |     |   |    |     |                                |
|--------------------------------------------------|-----|-----|-----|---|----|-----|--------------------------------|
| Short sedentary bouts <10 minutes                |     |     |     |   |    | no  | R1 exclusion criteria met      |
| Prolonged sedentary bouts >30 minutes            | 2%  | 15% | 83% | 9 | 41 | yes | meets in criteria R1 & R2      |
| Prolonged sedentary bouts >60 minutes            | 10% | 12% | 78% | 9 | 41 | yes | meets in criteria R1 & R2      |
| Standing bouts                                   | 5%  | 41% | 54% | 7 | 41 | no  | R2 Include criteria not met    |
| Stepping bouts                                   | 7%  | 37% | 56% | 7 | 41 | no  | R2 Include criteria not met    |
| Measure at baseline                              |     |     |     |   |    | yes | meets in criteria R1 (Obvious) |
| Measure at follow-up                             |     |     |     |   |    | yes | meets in criteria R1 (Obvious) |
| average duration of bout, mins                   | 5%  | 24% | 71% | 7 | 41 | yes | R2 meets include criteria      |
| total duration of bouts, mins or hours /day      | 7%  | 22% | 71% | 7 | 41 | yes | R2 meets include criteria      |
| n/day                                            | 7%  | 32% | 61% | 7 | 41 | no  | R2 Include criteria not met    |
| n/work day                                       |     |     |     |   |    | no  | R1 exclusion criteria met      |
| n/non-work day                                   |     |     |     |   |    | no  | R1 exclusion criteria met      |
| n/hours of workplace sitting                     | 17% | 41% | 41% | 6 | 41 | no  | R2 Include criteria not met    |
| n/non-work time on workday                       |     |     |     |   |    | no  | R1 exclusion criteria met      |
| total duration of bouts, mins or hours / workday |     |     |     |   |    | no  | R1 exclusion criteria met      |

|                                                                                                                        |     |     |     |     |    |     |                                |
|------------------------------------------------------------------------------------------------------------------------|-----|-----|-----|-----|----|-----|--------------------------------|
| Report as; mean, standard deviation, and range for participants, Pre and Post - intervention (baseline and follow- up) |     |     |     |     |    | yes | meets in criteria R1 (Obvious) |
| Report as; change in mean, and confidence interval, or change in rate for each outcome                                 |     |     |     |     |    | yes | meets in criteria R1 (Obvious) |
| Weighted median bout duration or bout "half-life"                                                                      | 15% | 47% | 38% | 5.5 | 34 | no  | R2 Include criteria not met    |
| Light intensity physical activity, time                                                                                | 0%  | 7%  | 93% | 9   | 41 | yes | meets in criteria R1 & R2      |
| Moderate intensity physical activity, time                                                                             | 0%  | 12% | 88% | 9   | 41 | yes | meets in criteria R1 & R2      |
| Vigorous intensity physical activity, time                                                                             | 0%  | 12% | 88% | 9   | 41 | yes | meets in criteria R1 & R2      |
| Moderate-vigorous intensity physical activity, time                                                                    | 0%  | 12% | 88% | 9   | 41 | yes | meets in criteria R1 & R2      |
| Physical Activity Energy Expenditure (kj/kg/day)                                                                       |     |     |     |     |    | no  | R1 exclusion criteria met      |
| Measure at baseline                                                                                                    |     |     |     |     |    | yes | meets in criteria R1 (Obvious) |
| Measure at follow-up                                                                                                   |     |     |     |     |    | yes | meets in criteria R1 (Obvious) |
| mins/day                                                                                                               | 2%  | 0%  | 98% | 9   | 41 | yes | meets in criteria R1 & R2      |
| mins/workday                                                                                                           | 12% | 49% | 39% | 6   | 41 | no  | R2 Include criteria not met    |
| % of daily waking hours                                                                                                | 12% | 12% | 76% | 8   | 41 | yes | R2 meets include criteria      |
| % wear time on work days                                                                                               |     |     |     |     |    | no  | R1 exclusion criteria met      |
| % wear time during work hours                                                                                          |     |     |     |     |    | no  | R1 exclusion criteria met      |

|                                                                                                                        |     |                                |
|------------------------------------------------------------------------------------------------------------------------|-----|--------------------------------|
| Report as; mean, standard deviation, and range for participants, Pre and Post - intervention (baseline and follow- up) | yes | meets in criteria R1 (Obvious) |
| Report as; change in mean, and confidence interval, for each outcome                                                   | yes | meets in criteria R1 (Obvious) |
| Waking hrs, all days                                                                                                   | no  | Parent domain excluded         |
| Waking hours, working day                                                                                              | no  | Parent domain excluded         |
| Waking hrs, non-working days                                                                                           | no  | Parent domain excluded         |
| Working hrs, working days                                                                                              | no  | Parent domain excluded         |
| Report as; mean, standard deviation, and range for participants, Pre and Post - intervention (baseline and follow- up) | no  | Parent domain excluded         |
| Report as; change in mean, and confidence interval, for each outcome                                                   | no  | Parent domain excluded         |

**Supplementary Table S7.** Final Core Outcome Set.

| Domain                                        | Item                                                                                                                     |
|-----------------------------------------------|--------------------------------------------------------------------------------------------------------------------------|
| Participants / Population Demographics        | Age                                                                                                                      |
| Participants / Population Demographics        | Gender                                                                                                                   |
| Participants / Population Demographics        | Population type                                                                                                          |
| Participants / Population Demographics        | BMI (body mass index)                                                                                                    |
| Participants / Population Demographics        | Measured at baseline                                                                                                     |
| Participants / Population Demographics        | Measured at follow-up                                                                                                    |
| Participants / Population Demographics        | Report as; Mean, standard deviation, and range, or number or % in each category, across all for participants at baseline |
| Participants / Population Demographics        | Report as; Mean, standard deviation, and range, or number or % in each category, across all participants at follow-up    |
| Type of device to measure sedentary behaviour | Accelerometer with Inclinometry Function*                                                                                |
| Device details and Wear time Criteria         | Device type (Make / Model /Manufacturer)                                                                                 |
| Device details and Wear time Criteria         | Device sensor position                                                                                                   |
| Device details and Wear time Criteria         | Device minimum wear time hours/day                                                                                       |

|                                       |                                                                                                                        |
|---------------------------------------|------------------------------------------------------------------------------------------------------------------------|
| Device details and Wear time Criteria | Device minimum wear time days/week                                                                                     |
| Device wear time                      | Device; total daily wear-time                                                                                          |
| Device wear time                      | Device; waking / non-sleep wear-time                                                                                   |
| Device wear time                      | Device; Sleep wear-time                                                                                                |
| Device wear time                      | Report as; mean, standard deviation and range,                                                                         |
| Posture related outcomes to measure   | Sedentary time                                                                                                         |
| Posture related outcomes to measure   | Sitting time                                                                                                           |
| Posture related outcomes to measure   | Standing time                                                                                                          |
| Posture related outcomes to measure   | Stepping time                                                                                                          |
| Posture related outcomes to measure   | Measure at baseline                                                                                                    |
| Posture related outcomes to measure   | Measure at follow-up                                                                                                   |
| Report posture related outcomes as;   | Daily time, in the specified posture                                                                                   |
| Report posture related outcomes as;   | % daily waking hours                                                                                                   |
| Report posture related outcomes as;   | % of total daily hours                                                                                                 |
| Report posture related outcomes as;   | Report as; Mean, standard deviation, and range for participants, Pre and Post - intervention (baseline and follow- up) |

|                                      |                                                                                                                        |
|--------------------------------------|------------------------------------------------------------------------------------------------------------------------|
| Report posture related outcomes as;  | Report as; change in mean, and confidence interval for each outcome                                                    |
| Sedentary Breaks outcomes to measure | Sedentary breaks; Sit to stand or upright transitions                                                                  |
| Sedentary Breaks outcomes to measure | Sedentary breaks; Movement breaks                                                                                      |
| Sedentary Breaks outcomes to measure | Measure at baseline                                                                                                    |
| Sedentary Breaks outcomes to measure | Measure at follow-up                                                                                                   |
| Report Sedentary Break outcomes as;  | n/day ; number of sedentary breaks daily                                                                               |
| Report Sedentary Break outcomes as;  | Report as; mean, standard deviation, and range for participants, Pre and Post - intervention (baseline and follow- up) |
| Report Sedentary Break outcomes as;  | Report as; change in mean, and confidence interval, or change in rate, for each outcome                                |
| Sedentary Bouts outcomes to measure; | Prolonged sedentary bouts >30 minutes                                                                                  |
| Sedentary Bouts outcomes to measure; | Prolonged sedentary bouts >60 minutes                                                                                  |
| Sedentary Bouts outcomes to measure; | Measure at baseline                                                                                                    |
| Sedentary Bouts outcomes to measure; | Measure at follow-up                                                                                                   |
| Report Sedentary Bout outcomes as;   | average duration of bout, mins                                                                                         |
| Report Sedentary Bout outcomes as;   | total duration of bouts, mins or hours /day                                                                            |

|                                        |                                                                                                                        |
|----------------------------------------|------------------------------------------------------------------------------------------------------------------------|
| Report Sedentary Bout outcomes as;     | Report as; mean, standard deviation, and range for participants, Pre and Post - intervention (baseline and follow- up) |
| Report Sedentary Bout outcomes as;     | Report as; change in mean, and confidence interval, or change in rate for each outcome                                 |
| Physical Activity outcomes to measure; | Light intensity physical activity, time                                                                                |
| Physical Activity outcomes to measure; | Moderate intensity physical activity, time                                                                             |
| Physical Activity outcomes to measure; | Vigorous intensity physical activity, time                                                                             |
| Physical Activity outcomes to measure; | Moderate-Vigorous intensity physical activity, time                                                                    |
| Physical Activity outcomes to measure; | Measure at baseline                                                                                                    |
| Physical Activity outcomes to measure; | Measure at follow-up                                                                                                   |
| Report Physical Activity outcomes as;  | mins/day                                                                                                               |
| Report Physical Activity outcomes as;  | % of daily waking hours                                                                                                |
| Report Physical Activity outcomes as;  | Report as; mean, standard deviation, and range for participants, Pre and Post - intervention (baseline and follow- up) |
| Report Physical Activity outcomes as;  | Report as; change in mean, and confidence interval, for each outcome                                                   |

\* Modified at ratification meeting from Combined Inclinometer/Accelerometer. Inclinometer not ratified

## Core Outcome Set-Standards for Reporting: The COS-STAR Statement Checklist

| SECTION/TOPIC             | ITEM No. | CHECKLIST ITEM                                                                                                                                                                                                   | REPORTED ON PAGE NUMBER |
|---------------------------|----------|------------------------------------------------------------------------------------------------------------------------------------------------------------------------------------------------------------------|-------------------------|
| TITLE/ABSTRACT            |          |                                                                                                                                                                                                                  |                         |
| Title                     | 1a       | Identify in the title that the paper reports the development of a COS                                                                                                                                            | 1                       |
| Abstract                  | 1b       | Provide a structured summary                                                                                                                                                                                     | 1                       |
| INTRODUCTION              |          |                                                                                                                                                                                                                  |                         |
| Background and Objectives | 2a       | Describe the background and explain the rationale for developing the COS.                                                                                                                                        | 1-2                     |
|                           | 2b       | Describe the specific objectives with reference to developing a COS.                                                                                                                                             | 2                       |
| Scope                     | 3a       | Describe the health condition(s) and population(s) covered by the COS.                                                                                                                                           | 2                       |
|                           | 3b       | Describe the intervention(s) covered by the COS.                                                                                                                                                                 | 2                       |
|                           | 3c       | Describe the setting(s) in which the COS is to be applied.                                                                                                                                                       | 2                       |
| METHODS                   |          |                                                                                                                                                                                                                  |                         |
| Protocol/Registry Entry   | 4        | Indicate where the COS development protocol can be accessed, if available, and/or the study registration details.                                                                                                | 3                       |
| Participants              | 5        | Describe the rationale for stakeholder groups involved in the COS development process, eligibility criteria for participants from each group, and a description of how the individuals involved were identified. | 4                       |
| Information Sources       | 6a       | Describe the information sources used to identify an initial list of outcomes.                                                                                                                                   | 3                       |
|                           | 6b       | Describe how outcomes were dropped/combined, with reasons (if applicable).                                                                                                                                       | 5, 7                    |
| Consensus Process         | 7        | Describe how the consensus process was undertaken.                                                                                                                                                               | 5-7                     |
| Outcome Scoring           | 8        | Describe how outcomes were scored and how scores were summarised.                                                                                                                                                | 6-7                     |
| Consensus Definition      | 9a       | Describe the consensus definition.                                                                                                                                                                               | 5                       |
|                           | 9b       | Describe the procedure for determining how outcomes were included or excluded from consideration during the consensus process.                                                                                   | 6                       |
| Ethics and Consent        | 10       | Provide a statement regarding the ethics and consent issues for the study.                                                                                                                                       | 12                      |
| RESULTS                   |          |                                                                                                                                                                                                                  |                         |
| Protocol Deviations       | 11       | Describe any changes from the protocol (if applicable), with reasons, and describe what impact these changes have on the results.                                                                                | n/a                     |
| Participants              | 12       | Present data on the number and relevant characteristics of the people involved at all stages of COS development.                                                                                                 | 4-5                     |

|                       |     |                                                                                                                    |                               |
|-----------------------|-----|--------------------------------------------------------------------------------------------------------------------|-------------------------------|
| Outcomes              | 13a | List all outcomes considered at the start of the consensus process.                                                | Supplementary table S1        |
|                       | 13b | Describe any new outcomes introduced and any outcomes dropped, with reasons, during the consensus process.         | Supplementary table S5 and S6 |
| COS                   | 14  | List the outcomes in the final COS.                                                                                | 12 and supplementary table S7 |
| DISCUSSION            |     |                                                                                                                    |                               |
| Limitations           | 15  | Discuss any limitations in the COS development process.                                                            | 11                            |
| Conclusions           | 16  | Provide an interpretation of the final COS in the context of other evidence, and implications for future research. | 8-11                          |
| OTHER INFORMATION     |     |                                                                                                                    |                               |
| Funding               | 17  | Describe sources of funding/role of funders.                                                                       | 12                            |
| Conflicts of Interest | 18  | Describe any conflicts of interest within the study team and how these were managed.                               | 12                            |

From: Kirkham JJ, Gorst S, Altman DG, Blazeby JM, Clarke M, Devane D, et al. (2016) Core Outcome Set–STAndards for Reporting: The COS-STAR Statement. *PLoS Med* 13(10): e1002148.  
<https://doi.org/10.1371/journal.pmed.1002148>
